# Supplementary material for: Three-dimensionally ordered macroporous Li3V2(PO4)3/C nanocomposite cathode material for high-capacity and high-rate Li-ion batteries
Source: Royal Society of Chemistry journal article supplement (doi:10.1039/c3nr04927b), 2013-12-19
Supplement: c3nr04927b.pdf [file c3nr04927b.pdf]

## Supporting Information

### Three-Dimensionally Ordered Macroporous $\text{Li}_3\text{V}_2(\text{PO}_4)_3/\text{C}$ Nanocomposite Cathode Materials for High-Capacity and High-Rate Li-Ion Batteries

Donglin Li\*, Miao Tian, Rong Xie, Qian Li, Xiaoyong Fan, Lei Gou, Peng Zhao, Shoulong Ma,  
Yongxin Shi, Hong-Tuan-Hua Yong

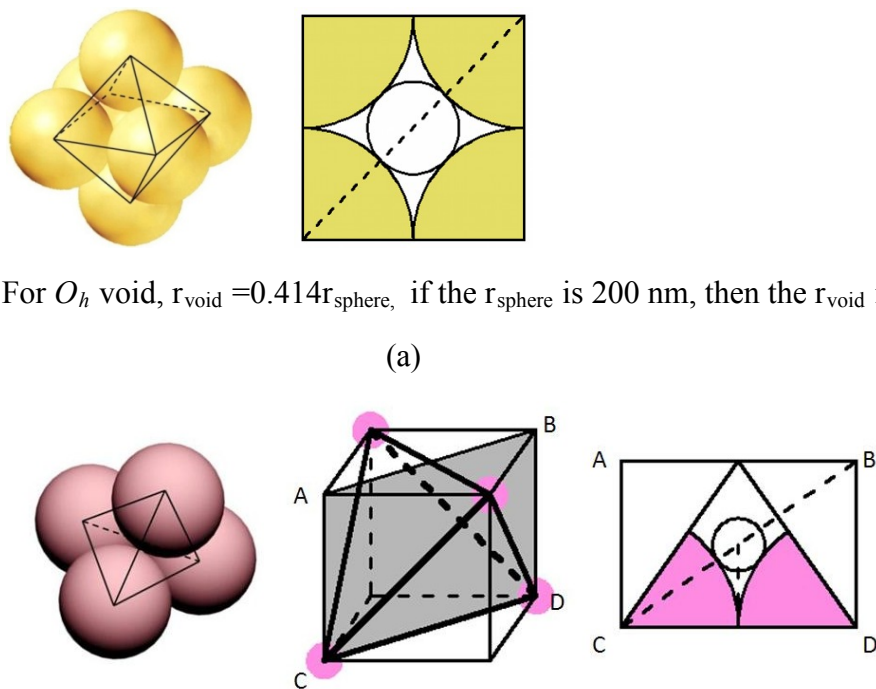

**Figure S1.** The interstitial and voids radius ( $r_{\text{void}}$ ) calculation in face close-packed cubic PMMA colloidal crystal arrays ( $r_{\text{sphere}}$  denotes the radius of PMMA colloidal sphere). (a) octahedral void ( $O_h$ ), (b) tetrahedral void ( $T_d$ ).

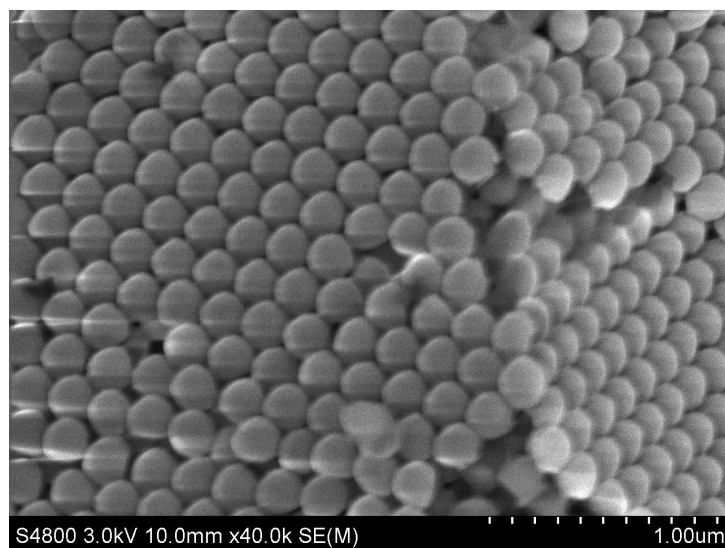

Figure S2 FESEM image of PMMA CCA template showing fcc closed-packed structure.

(a)

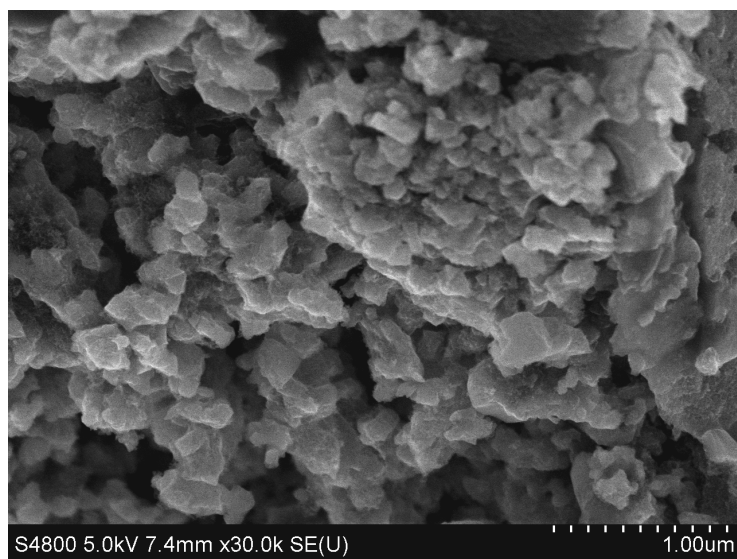

(b)

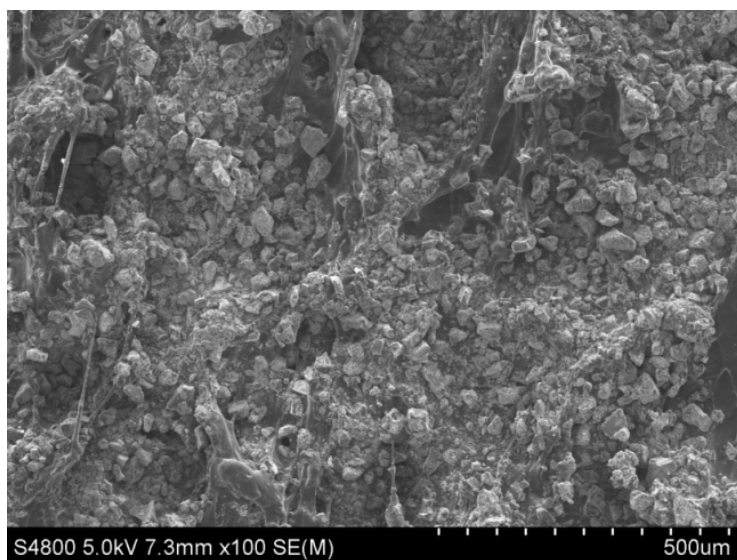

**Figure S3.** High (a) and low (b) magnification FESEM images of the LVP/C sample calcined at 750 °C.

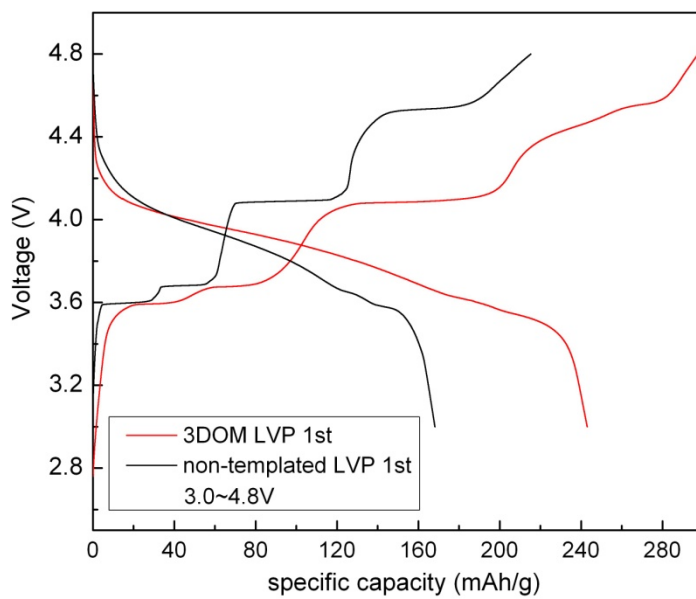

**Figure S4.** The initial charge/discharge curves of LVP/C and 3DOM LVP/C nanocomposites calcined at 750 °C between 3.0 ~ 4.8V.
